# Supplementary material for: Simultaneous Quantification and Pharmacokinetic Characterization of Doxapram and 2-Ketodoxapram in Porcine Plasma and Brain Tissue
Source: MDPI journal article supplement (doi:10.3390/pharmaceutics14040762), 2022-03-31
Supplement: s1 [file s1]

# Supplementary Materials: Simultaneous Quantification and Pharmacokinetic Characterization of Doxapram and 2-Ketodoxapram in Porcine Plasma and Brain Tissue

Manuel Kraft, Kathrin I. Foerster, Felix Wiedmann, Max Sauter, Amelie Paasche, Pablo L. Blochberger, Baran Yesilgöz, Yannick L'hoste, Norbert Frey, Walter E. Haefeli, Jürgen Burhenne and Constanze Schmidt

Supplementary Figures:

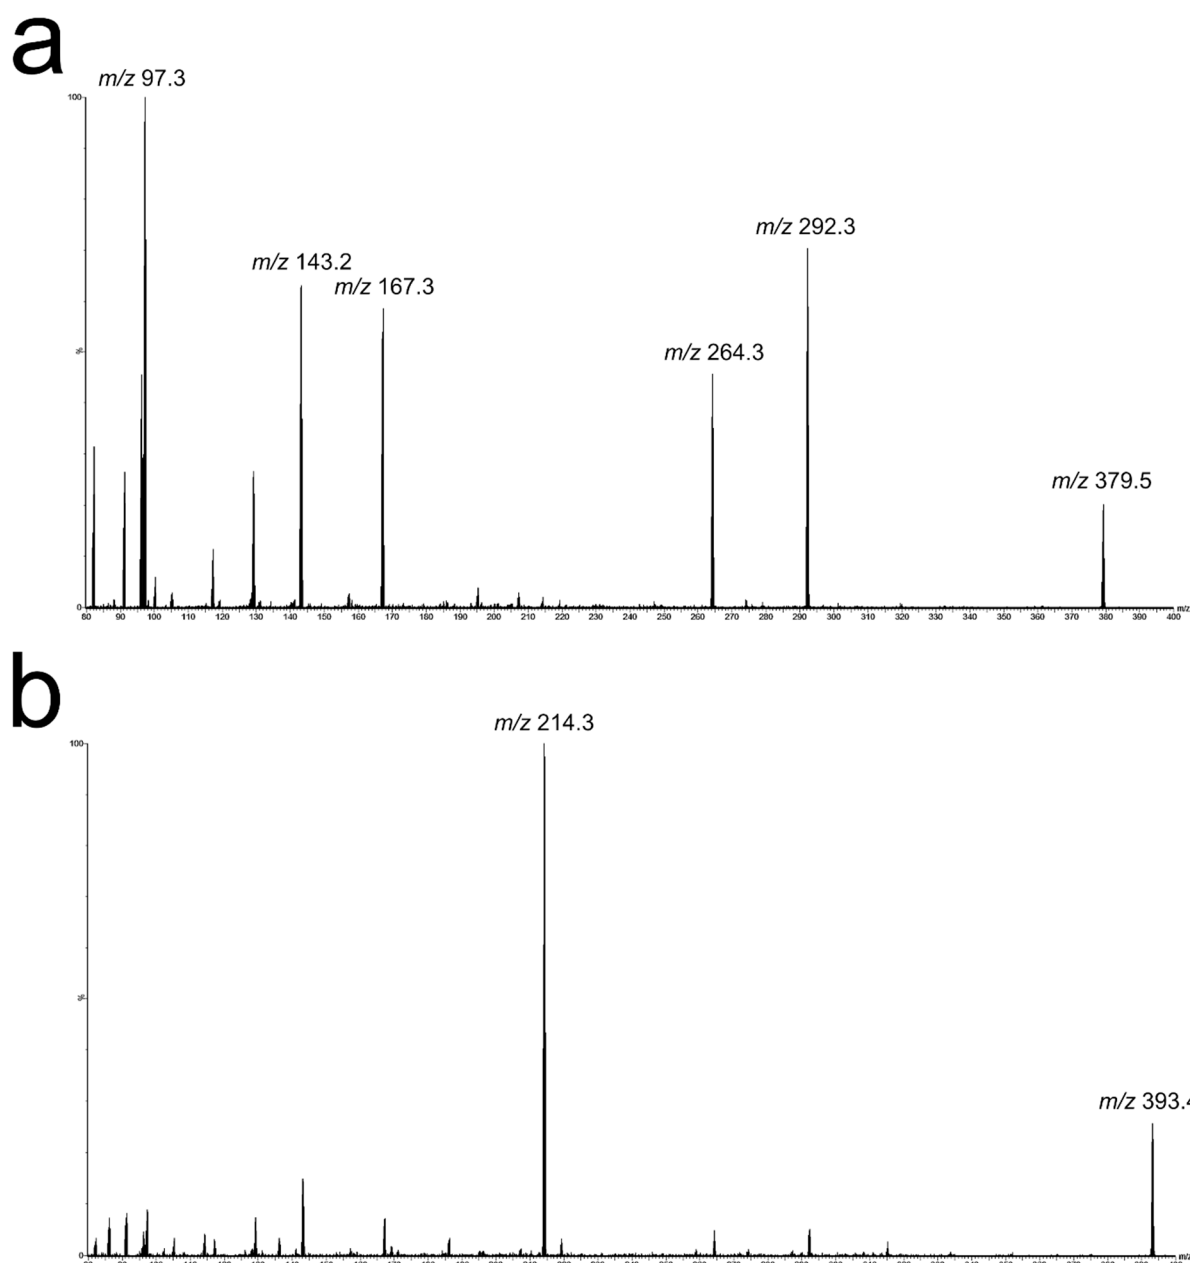

**Figure S1. Tandem mass spectrum (MS/MS) of doxapram and 2-ketodoxapram.** Tandem mass spectrum using electrospray ionization in positive mode of the  $[M+H]^+$  signal  $m/z$  379.5 (doxapram; **(a)** after collision-induced decomposition with a collision energy of 18 V and of the  $[M+H]^+$  signal  $m/z$  393.4 (2-ketodoxapram; **(b)** applying a collision energy of 23 V.

a

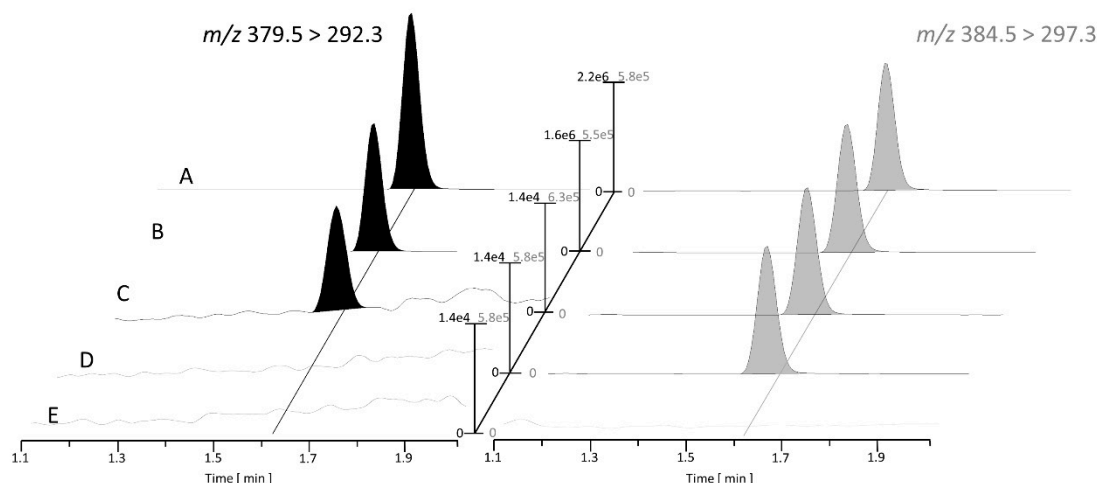

b

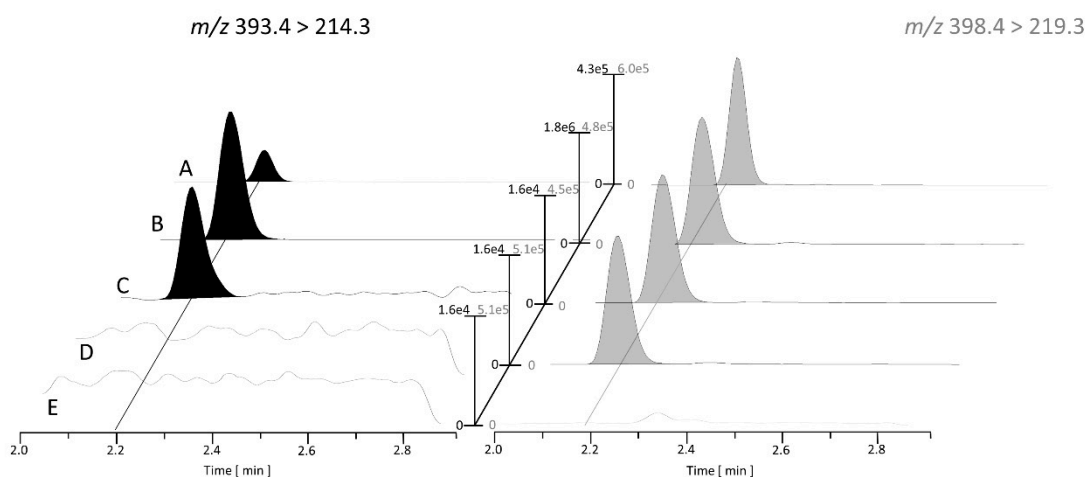

**Figure S2. Selected chromatograms of the assay validated for the quantification of high plasma concentrations.** Analyte transition is depicted on the left side in black and internal standard (IS) transition on the right side in grey. Top (a): transitions of doxapram and the IS doxapram-d5; Bottom (b): transitions of 2-ketodoxapram and the IS ketodoxapram-d5. (A) plasma sample taken 15 min after administration of 1 mg/kg doxapram to pig #154 (representing 1,095 ng/mL doxapram and 30.1 ng/mL 2-ketodoxapram), (B) sample at mid quality control (QC) concentration (150 ng/mL), (C) sample at lower limit of quantification (LLOQ) concentration (1 ng/mL), (D) sample with added IS, and (E) blank sample. Intensities of blank samples were normalized to the intensity of the LLOQ sample. The plasma sample was normalized to the intensity of the QC sample. The transition of IS and the analyte were processed separately and independently for doxapram and 2-ketodoxapram.

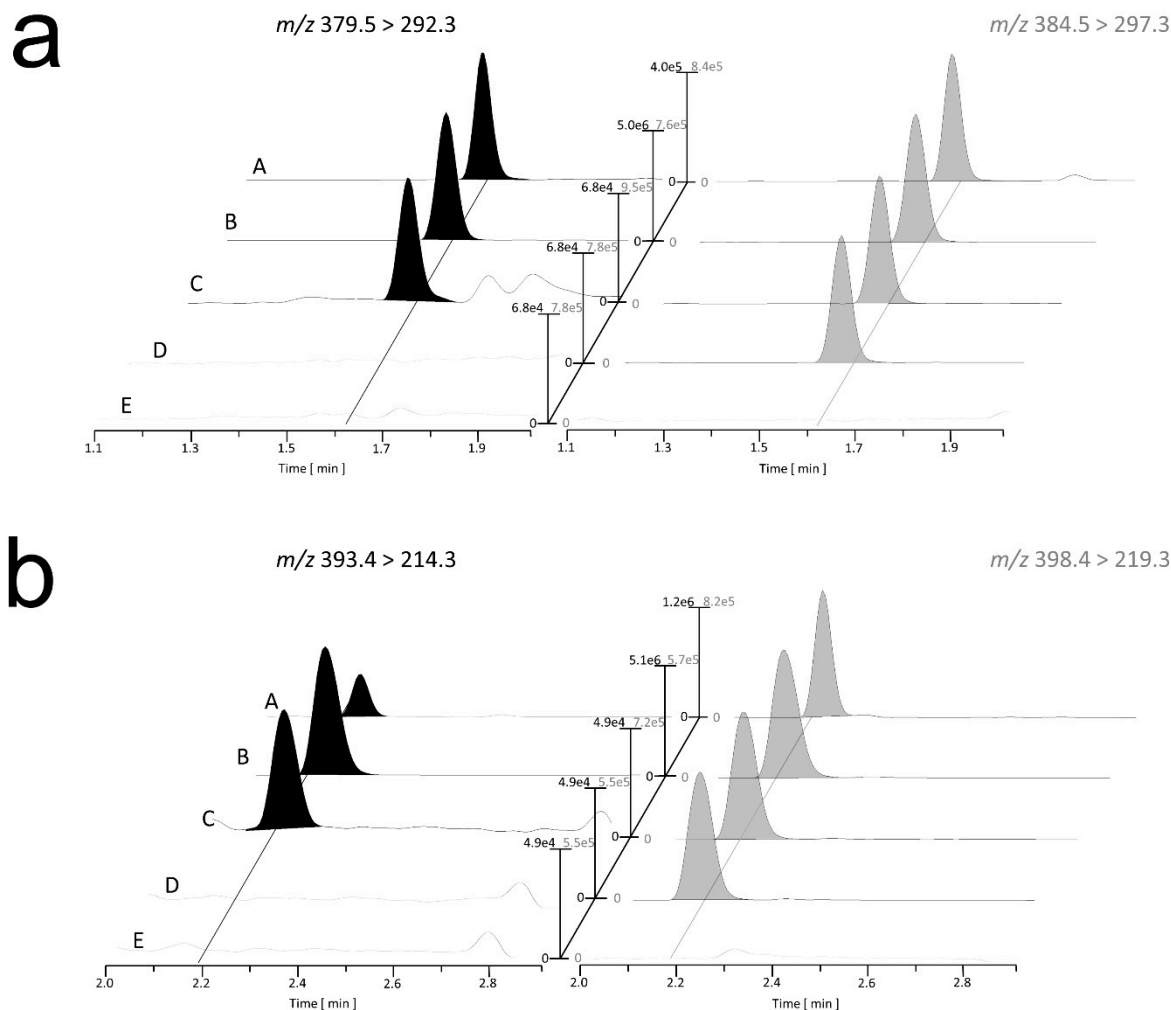

**Figure S3. Selected chromatograms of the assay validated for quantification of low plasma concentrations.** Analyte transition is depicted on the left side in black and internal standard (IS) transition on the right side in grey. Top (a): transitions of doxapram and the IS doxapram-d5; Bottom (b): transitions of 2-ketodoxapram and the IS ketodoxapram-d5. (A) plasma sample taken at the final operation after 14 d of daily administration of 1 mg/kg doxapram to pig #155 (representing 111 pg/mL doxapram and 225 pg/mL 2-ketodoxapram), (B) sample at mid quality control (QC) concentration (1,500 pg/mL), (C) sample at lower limit of quantification (LLOQ) concentration (10 pg/mL), (D) sample with added IS, and (E) blank sample. Intensities of blank samples were normalized to the intensity of the LLOQ sample. The plasma sample was normalized to the intensity of the QC sample. The transition of IS and the analyte were processed separately and independently for doxapram and 2-ketodoxapram.

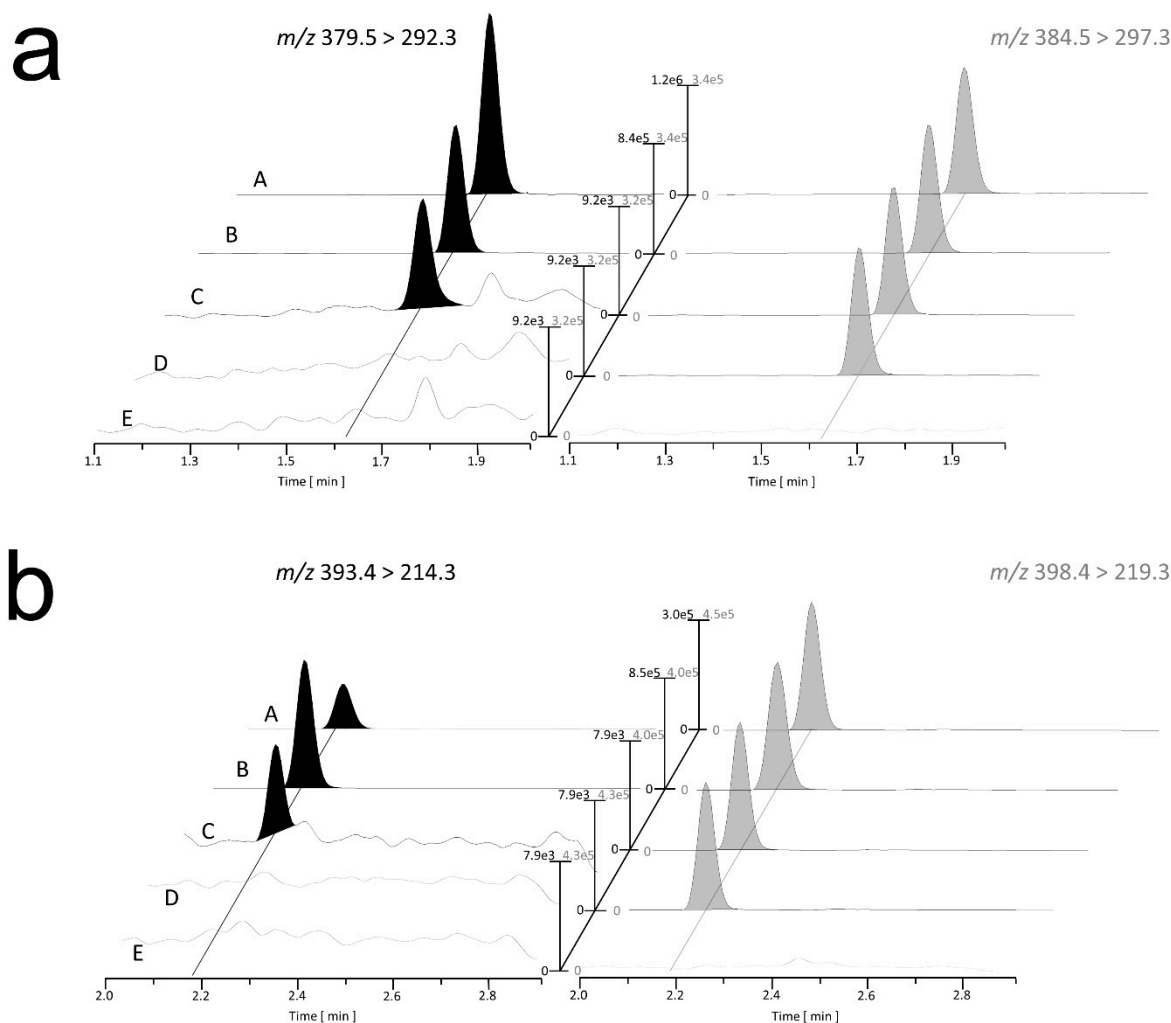

**Figure S4. Selected chromatograms of the assay validated for quantification of brain tissue concentrations.** Analyte transition is depicted on the right side in black and internal standard (IS) transition on the right side in grey. Top (a): transitions of doxapram and the IS doxapram-d5; Bottom (b): transitions of 2-ketodoxapram and the IS ketodoxapram-d5. (A) brain tissue sample taken at the final operation after 14 d of daily administration of 1 mg/kg doxapram to pig #154 (representing 164 pg/sample doxapram and 37.3 pg/sample 2-ketodoxapram), (B) sample at mid quality control (QC) concentration (150 pg/sample), (C) sample at lower limit of quantification (LLOQ) concentration (1 pg/sample), (D) sample with added IS, and (E) blank sample. Intensities of blank samples were normalized to the intensity of the LLOQ sample. The plasma sample was normalized to the intensity of the QC sample. The transition of IS and the analyte were processed separately and independently for doxapram and 2-ketodoxapram.

## Supplementary Tables:

**Table S1.** Matrix effect and recovery data of the assay validated for quantification of high plasma concentrations.

| High Plasma Concentrations | Doxapram |       |       |       | 2-Ketodoxapram |      |       |       |
|----------------------------|----------|-------|-------|-------|----------------|------|-------|-------|
|                            | QC A     | QC B  | QC C  | QC D  | QC A           | QC B | QC C  | QC D  |
| Nominal value [ng/mL]      | 3        | 15    | 150   | 1,500 | 3              | 15   | 150   | 1,500 |
| Matrix effect [%]          |          |       |       |       |                |      |       |       |
| Lot #1                     | 95.0     | 99.7  | 100.9 | 99.5  | 96.9           | 99.4 | 101.1 | 100.1 |
| Lot #2                     | 98.8     | 99.4  | 99.7  | 100.0 | 103.6          | 99.4 | 100.0 | 100.4 |
| Lot #3                     | 95.0     | 99.7  | 100.5 | 99.8  | 101.8          | 99.3 | 100.1 | 100.1 |
| Lot #4                     | 100.6    | 99.6  | 100.8 | 99.5  | 101.8          | 99.8 | 100.0 | 100.4 |
| Lot #5                     | 98.8     | 100.5 | 100.3 | 99.9  | 100.0          | 99.0 | 100.3 | 100.2 |
| Lot #6                     | 96.3     | 101.0 | 100.8 | 99.3  | 100.4          | 99.4 | 99.4  | 99.7  |
| Mean                       | 97.4     | 100.0 | 100.5 | 99.7  | 100.8          | 99.3 | 100.1 | 100.2 |
| Recovery [%]               |          |       |       |       |                |      |       |       |
| Lot #1                     | 99.3     | 98.1  | 97.7  | 99.0  | 100.2          | 98.5 | 97.8  | 98.6  |
| Lot #2                     | 95.6     | 98.4  | 98.9  | 98.5  | 93.7           | 98.6 | 98.9  | 98.3  |
| Lot #3                     | 99.3     | 98.1  | 98.1  | 98.6  | 95.4           | 98.6 | 98.8  | 98.6  |
| Lot #4                     | 93.8     | 98.2  | 97.8  | 98.9  | 95.4           | 98.1 | 98.9  | 98.3  |
| Lot #5                     | 95.6     | 97.3  | 98.3  | 98.6  | 97.1           | 98.9 | 98.6  | 98.6  |
| Lot #6                     | 98.1     | 96.8  | 97.8  | 99.2  | 96.7           | 98.5 | 99.5  | 99.0  |
| Mean                       | 96.9     | 97.8  | 98.1  | 98.8  | 96.4           | 98.6 | 98.7  | 98.6  |

Internal standard (IS)-normalized matrix effect and recovery were evaluated in six different lots of blank matrix at all four QC levels. All values are within the required limit of  $\pm 15\%$ .

**Table S2.** Matrix effect and recovery data of the assay validated for quantification of low plasma concentrations.

| Low Plasma Concentrations | Doxapram |       |       |       | 2-Ketodoxapram |       |       |       |
|---------------------------|----------|-------|-------|-------|----------------|-------|-------|-------|
|                           | QC A     | QC B  | QC C  | QC D  | QC A           | QC B  | QC C  | QC D  |
| Nominal value [pg/mL]     | 30       | 150   | 1,500 | 7,500 | 30             | 150   | 1,500 | 7,500 |
| Matrix effect [%]         |          |       |       |       |                |       |       |       |
| Lot #1                    | 113.4    | 101.8 | 100.4 | 99.7  | 97.6           | 99.0  | 98.3  | 98.3  |
| Lot #2                    | 112.9    | 104.4 | 100.4 | 99.2  | 99.6           | 99.9  | 98.1  | 98.7  |
| Lot #3                    | 105.5    | 100.7 | 100.7 | 99.2  | 99.1           | 99.2  | 98.5  | 99.0  |
| Lot #4                    | 106.5    | 101.3 | 100.3 | 99.2  | 99.3           | 99.0  | 98.4  | 98.7  |
| Lot #5                    | 111.0    | 103.5 | 99.6  | 99.9  | 98.9           | 98.6  | 98.4  | 98.6  |
| Lot #6                    | 113.4    | 101.3 | 101.0 | 98.9  | 99.7           | 99.2  | 98.9  | 99.2  |
| Mean                      | 110.4    | 102.1 | 100.4 | 99.4  | 98.9           | 99.2  | 98.4  | 98.7  |
| Recovery [%]              |          |       |       |       |                |       |       |       |
| Lot #1                    | 95.4     | 98.6  | 97.5  | 98.8  | 98.6           | 99.6  | 98.3  | 99.8  |
| Lot #2                    | 95.8     | 96.1  | 97.6  | 99.4  | 96.6           | 98.7  | 98.6  | 99.4  |
| Lot #3                    | 102.6    | 99.6  | 97.3  | 99.3  | 97.2           | 99.5  | 98.2  | 99.0  |
| Lot #4                    | 101.7    | 99.0  | 97.6  | 99.3  | 97.0           | 99.6  | 98.2  | 99.4  |
| Lot #5                    | 97.5     | 96.9  | 98.3  | 98.6  | 97.3           | 100.1 | 98.3  | 99.5  |
| Lot #6                    | 95.4     | 99.0  | 96.9  | 99.6  | 97.2           | 99.5  | 97.7  | 98.9  |
| Mean                      | 98.0     | 98.3  | 97.5  | 99.2  | 97.3           | 99.5  | 98.2  | 99.3  |

Internal standard (IS)-normalized matrix effect and recovery were evaluated in six different lots of blank matrix at all four QC levels. All values are within the required limit of  $\pm 15\%$ .

**Table S3.** Matrix effect and recovery data of the assay validated for quantification of brain tissue.

| Brain Tissue          | Doxapram |       |       |       | 2-Ketodoxapram |       |       |       |
|-----------------------|----------|-------|-------|-------|----------------|-------|-------|-------|
|                       | QC A     | QC B  | QC C  | QC D  | QC A           | QC B  | QC C  | QC D  |
| Nominal value [pg/XX] | 1.5      | 15    | 150   | 1,500 | 1.5            | 15    | 150   | 1,500 |
| Matrix effect [%]     |          |       |       |       |                |       |       |       |
| Lot #1                | 107.8    | 98.6  | 100.4 | 100.6 | 100            | 101.9 | 103.4 | 102.7 |
| Lot #2                | 107.8    | 100.4 | 99.1  | 99.7  | 114.1          | 102.5 | 102.8 | 102.7 |
| Lot #3                | 103.2    | 101.1 | 100.4 | 99.3  | 114.1          | 103.0 | 103.0 | 102.5 |
| Lot #4                | 109.1    | 99.0  | 99.5  | 101.5 | 101.3          | 104.3 | 101.8 | 101.6 |
| Lot #5                | 110.4    | 100.3 | 99.6  | 99.8  | 110.3          | 100.6 | 101.0 | 100.2 |
| Lot #6                | 109.1    | 101.5 | 101.0 | 100.7 | 107.7          | 100.6 | 100.1 | 101.9 |
| Mean                  | 108.1    | 100.2 | 100.0 | 100.3 | 107.9          | 102.1 | 102.0 | 102.0 |
| Recovery [%]          |          |       |       |       |                |       |       |       |
| Lot #1                | 91.6     | 103.0 | 100.6 | 98.2  | 100.0          | 98.6  | 99.1  | 98.6  |
| Lot #2                | 91.6     | 101.2 | 101.9 | 99.1  | 87.6           | 98.0  | 99.7  | 98.6  |
| Lot #3                | 95.6     | 100.5 | 100.6 | 99.5  | 87.6           | 97.5  | 99.5  | 98.8  |
| Lot #4                | 90.5     | 102.6 | 101.5 | 97.3  | 98.7           | 96.4  | 100.7 | 99.6  |
| Lot #5                | 89.4     | 101.3 | 101.4 | 99.0  | 90.7           | 99.9  | 101.6 | 101.1 |
| Lot #6                | 90.5     | 100.1 | 100.0 | 98.1  | 92.9           | 99.6  | 102.4 | 99.4  |
| Mean                  | 91.0     | 101.4 | 101.0 | 98.5  | 92.7           | 98.4  | 100.5 | 99.3  |

Internal standard (IS)-normalized matrix effect and recovery were evaluated in six different lots of blank matrix at all four QC levels. All values are within the required limit of  $\pm 15\%$ .

**Table S4.** Accuracy and precision data of the assay validated for quantification of high plasma concentrations.

| High Plasma Concentrations |                         | Doxapram |      |       |       |       | 2-Ketodoxapram |       |       |       |       |
|----------------------------|-------------------------|----------|------|-------|-------|-------|----------------|-------|-------|-------|-------|
|                            |                         | LLOQ     | QC A | QC B  | QC C  | QC D  | LLOQ           | QC A  | QC B  | QC C  | QC D  |
|                            |                         | 1        | 3    | 15    | 150   | 1,500 | 1              | 3     | 15    | 150   | 1,500 |
| <b>Within run</b>          |                         |          |      |       |       |       |                |       |       |       |       |
| 1                          | Mean [ng/mL]            | 1.0      | 2.7  | 14.0  | 145.2 | 1,447 | 1.1            | 3.2   | 15.7  | 160.5 | 1,555 |
|                            | Accuracy [%]            | 99.8     | 90.3 | 93.1  | 96.8  | 96.5  | 107.4          | 105.0 | 104.6 | 107.0 | 103.6 |
|                            | Precision [%]           | 7.9      | 3.3  | 4.0   | 0.9   | 0.9   | 3.6            | 3.5   | 2.8   | 0.7   | 1.1   |
|                            | correlation coefficient |          |      | 0.999 |       |       |                |       | 0.999 |       |       |
| 2                          | Mean [ng/mL]            | 1.0      | 2.8  | 13.9  | 144.2 | 1,435 | 1.0            | 3.1   | 15.6  | 159.2 | 1,566 |
|                            | Accuracy [%]            | 104.3    | 93.3 | 92.9  | 96.1  | 95.7  | 103.1          | 102.3 | 104.0 | 106.1 | 104.4 |
|                            | Precision [%]           | 5.4      | 3.3  | 1.0   | 1.1   | 1.1   | 7.6            | 3.8   | 0.6   | 0.6   | 0.9   |
|                            | correlation coefficient |          |      | 0.999 |       |       |                |       | 0.999 |       |       |
| 3                          | Mean [ng/mL]            | 1.1      | 2.8  | 14.0  | 142.1 | 1,431 | 1.1            | 3.1   | 15.6  | 158.3 | 1,562 |
|                            | Accuracy [%]            | 107.7    | 91.9 | 93.4  | 94.7  | 95.4  | 108.1          | 103.9 | 103.7 | 105.5 | 104.1 |
|                            | Precision [%]           | 4.0      | 2.8  | 2.9   | 2.3   | 3.0   | 6.4            | 4.2   | 2.1   | 1.5   | 3.1   |
|                            | correlation coefficient |          |      | 0.999 |       |       |                |       | 0.999 |       |       |
| <b>Between runs</b>        |                         |          |      |       |       |       |                |       |       |       |       |
|                            | Mean [ng/mL]            | 1.0      | 2.8  | 14.0  | 143.8 | 1,438 | 1.1            | 3.1   | 15.6  | 159.3 | 1,561 |
|                            | Accuracy [%]            | 103.7    | 91.8 | 93.1  | 95.9  | 95.8  | 106.1          | 103.7 | 104.1 | 106.2 | 104.0 |
|                            | Precision [%]           | 6.5      | 3.3  | 2.7   | 1.7   | 1.9   | 6.0            | 3.8   | 2.0   | 1.1   | 1.9   |

Within run (intra-day) and between runs (inter-day) comparisons were evaluated six-fold in three separate batches at all four QC levels. All values are within the required limit of  $\pm 15\%$ .



**Table S5.** Accuracy and precision data of the assay validated for quantification of low plasma concentrations.

| Low Plasma Concentrations |                         | Doxapram |      |      |       |       | 2-Ketodoxapram |       |       |       |       |
|---------------------------|-------------------------|----------|------|------|-------|-------|----------------|-------|-------|-------|-------|
|                           |                         | LLOQ     | QC A | QC B | QC C  | QC D  | LLOQ           | QC A  | QC B  | QC C  | QC D  |
|                           |                         | 10       | 30   | 150  | 1,500 | 7,500 | 10             | 30    | 150   | 1,500 | 7,500 |
| Within run                |                         |          |      |      |       |       |                |       |       |       |       |
| 1                         | Mean [pg/mL]            | 10.7     | 28.4 | 143  | 1,437 | 7,157 | 10.6           | 31.6  | 158   | 1,580 | 7,864 |
|                           | Accuracy [%]            | 106.8    | 94.8 | 95.2 | 95.8  | 95.4  | 106.4          | 105.2 | 105.5 | 105.3 | 104.9 |
|                           | Precision [%]           | 3.6      | 5.5  | 0.9  | 1.3   | 0.4   | 4.3            | 1.0   | 1.4   | 0.9   | 0.7   |
|                           | correlation coefficient | 0.999    |      |      |       |       | 0.999          |       |       |       |       |
| 2                         | Mean [pg/mL]            | 10.0     | 27.0 | 142  | 1,419 | 6,939 | 10.6           | 31.7  | 157   | 1,568 | 7,712 |
|                           | Accuracy [%]            | 99.5     | 90.0 | 94.5 | 94.6  | 92.5  | 105.8          | 105.8 | 104.6 | 104.6 | 102.8 |
|                           | Precision [%]           | 2.4      | 2.5  | 0.5  | 1.5   | 1.0   | 3.4            | 2.2   | 1.5   | 1.6   | 0.9   |
|                           | correlation coefficient | 0.999    |      |      |       |       | 0.999          |       |       |       |       |
| 3                         | Mean [pg/mL]            | 10.6     | 27.5 | 142  | 1,442 | 7,192 | 10.1           | 31.1  | 158   | 1,589 | 7,802 |
|                           | Accuracy [%]            | 106.1    | 91.5 | 94.5 | 96.1  | 95.9  | 100.6          | 103.6 | 105.5 | 105.9 | 104.0 |
|                           | Precision [%]           | 6.4      | 3.0  | 1.8  | 0.7   | 2.6   | 3.8            | 1.7   | 0.6   | 0.8   | 4.8   |
|                           | correlation coefficient | 0.999    |      |      |       |       | 0.999          |       |       |       |       |
| Between runs              |                         |          |      |      |       |       |                |       |       |       |       |
|                           | Mean [pg/mL]            | 10.4     | 27.6 | 142  | 1,433 | 7,096 | 10.5           | 31.5  | 158   | 1,579 | 7,793 |
|                           | Accuracy [%]            | 104.0    | 91.9 | 94.7 | 95.5  | 94.6  | 104.5          | 104.9 | 105.2 | 105.3 | 103.9 |
|                           | Precision [%]           | 5.3      | 4.2  | 1.2  | 1.3   | 2.3   | 4.4            | 1.8   | 1.2   | 1.2   | 2.8   |

Within run (intra-day) and between runs (inter-day) comparisons were evaluated six-fold in three separate batches at all four QC levels. All values are within the required limit of  $\pm 15\%$ .

**Table S6.** Accuracy and precision data of the assay validated for quantification of brain tissue.

| Brain Tissue        |                         | Doxapram |       |       |       |       | 2-Ketodoxapram |       |       |       |       |
|---------------------|-------------------------|----------|-------|-------|-------|-------|----------------|-------|-------|-------|-------|
|                     |                         | LLOQ     | QC A  | QC B  | QC C  | QC D  | LLOQ           | QC A  | QC B  | QC C  | QC D  |
|                     |                         | 1        | 1.5   | 15    | 150   | 1,500 | 1              | 1.5   | 15    | 150   | 1,500 |
| <b>Within run</b>   |                         |          |       |       |       |       |                |       |       |       |       |
| 1                   | Mean [pg/sample]        | 1.0      | 1.4   | 14.1  | 148   | 1,496 | 1.1            | 1.6   | 16.3  | 163   | 1,652 |
|                     | Accuracy [%]            | 96.4     | 93.8  | 93.7  | 98.6  | 99.7  | 107.5          | 105.8 | 108.4 | 108.7 | 110.1 |
|                     | Precision [%]           | 5.6      | 3.2   | 3.9   | 1.2   | 1.8   | 4.7            | 2.2   | 1.3   | 0.7   | 0.9   |
|                     | correlation coefficient |          |       | 0.998 |       |       |                |       | 0.998 |       |       |
| 2                   | Mean [pg/sample]        | 1.0      | 1.6   | 14.5  | 149   | 1,473 | 1.0            | 1.6   | 15.7  | 166   | 1,649 |
|                     | Accuracy [%]            | 101.6    | 106.6 | 96.7  | 99.1  | 98.2  | 98.8           | 105.5 | 104.8 | 110.7 | 109.9 |
|                     | Precision [%]           | 7.6      | 3.7   | 1.9   | 0.9   | 0.9   | 8.4            | 3.9   | 1.3   | 1.0   | 0.8   |
|                     | correlation coefficient |          |       | 0.999 |       |       |                |       | 0.999 |       |       |
| 3                   | Mean [pg/sample]        | 1.0      | 1.5   | 15.2  | 152   | 1,544 | 1.0            | 1.4   | 15.8  | 161   | 1,603 |
|                     | Accuracy [%]            | 101.6    | 99.6  | 101.4 | 101.5 | 102.9 | 98.1           | 95.3  | 105.4 | 107.2 | 106.9 |
|                     | Precision [%]           | 6.0      | 8.0   | 2.4   | 2.2   | 0.8   | 8.3            | 6.3   | 2.9   | 1.7   | 2.2   |
|                     | correlation coefficient |          |       | 0.999 |       |       |                |       | 0.999 |       |       |
| <b>Between runs</b> |                         |          |       |       |       |       |                |       |       |       |       |
|                     | Mean [pg/sample]        | 1.0      | 1.5   | 14.6  | 150   | 1,504 | 1.0            | 1.5   | 15.9  | 163   | 1,635 |
|                     | Accuracy [%]            | 99.8     | 100.0 | 97.3  | 99.7  | 100.3 | 101.6          | 102.6 | 106.2 | 108.9 | 109.0 |
|                     | Precision [%]           | 6.6      | 7.4   | 4.3   | 2.0   | 2.3   | 8.0            | 6.2   | 2.4   | 1.8   | 1.9   |

Within run (intra-day) and between runs (inter-day) comparisons were evaluated six-fold in three separate batches at all four QC levels. All values are within the required limit of  $\pm 15\%$ .

**Table S7.** Stability data for the assay validated for quantification of high plasma concentrations.

| High Plasma Concentrations | Doxapram  |            |             |               | 2-Ketodoxapram |            |             |               |
|----------------------------|-----------|------------|-------------|---------------|----------------|------------|-------------|---------------|
|                            | QC A<br>3 | QC B<br>15 | QC C<br>150 | QC D<br>1,500 | QC A<br>3      | QC B<br>15 | QC C<br>150 | QC D<br>1,500 |
| Freeze-and-thaw            |           |            |             |               |                |            |             |               |
| Mean [ng/mL]               | 2.8       | 13.98      | 143.2       | 1,421         | 3.1            | 15.7       | 158.5       | 1,546         |
| Accuracy [%]               | 92.9      | 93.2       | 95.5        | 94.8          | 101.7          | 104.4      | 105.6       | 103.1         |
| Precision [%]              | 1.9       | 0.6        | 0.7         | 1.0           | 2.3            | 1.4        | 0.5         | 0.5           |
| Autosampler                |           |            |             |               |                |            |             |               |
| Mean [ng/mL]               | 2.8       | 13.7       | 141.1       | 1,410         | 3.1            | 15.3       | 157.3       | 1,538         |
| Accuracy [%]               | 93.1      | 91.1       | 94.1        | 94.0          | 103.3          | 101.9      | 104.8       | 102.5         |
| Precision [%]              | 1.6       | 5.6        | 0.6         | 0.6           | 5.3            | 4.8        | 0.6         | 0.9           |
| Stability -20 °C           |           |            |             |               |                |            |             |               |
| Mean [ng/mL]               | 2.8       | 14.3       | 146.1       | 1,421         | 3.1            | 16.1       | 160.2       | 1,534         |
| Accuracy [%]               | 94.1      | 95.1       | 97.4        | 94.7          | 103.7          | 107.3      | 106.8       | 102.2         |
| Precision [%]              | 3.3       | 2.8        | 1.6         | 0.6           | 2.3            | 2.6        | 0.9         | 0.8           |
| Stability RT               |           |            |             |               |                |            |             |               |
| Mean [ng/mL]               | 2.9       | 14.2       | 145.4       | 1,447         | 3.1            | 15.9       | 162.3       | 1,562         |
| Accuracy [%]               | 96.1      | 94.7       | 96.9        | 96.5          | 104.2          | 105.9      | 108.2       | 104.2         |
| Precision [%]              | 1.1       | 6.2        | 0.9         | 2.3           | 0.6            | 2.0        | 1.5         | 1.8           |

Accuracy and precision values after three freeze-and-thaw cycles, storing overnight in the autosampler at 15 °C, after 16 d in the freezer at -20 °C, or after 24 h at room temperature (RT). All measurements have been conducted in triplicates.

**Table S8.** Stability data for the assay validated for quantification of low plasma concentrations.

| Low Plasma Concentrations | Doxapram   |             |               |               | 2-Ketodoxapram |             |               |               |
|---------------------------|------------|-------------|---------------|---------------|----------------|-------------|---------------|---------------|
|                           | QC A<br>30 | QC B<br>150 | QC C<br>1,500 | QC D<br>7,500 | QC A<br>30     | QC B<br>150 | QC C<br>1,500 | QC D<br>7,500 |
| Freeze-and-thaw           |            |             |               |               |                |             |               |               |
| Mean [pg/mL]              | 27.2       | 140.2       | 1,446.2       | 7,092         | 31.1           | 156.0       | 1,581.4       | 7,775         |
| Accuracy [%]              | 90.8       | 93.4        | 96.4          | 94.6          | 103.7          | 104.0       | 105.4         | 103.7         |
| Precision [%]             | 7.7        | 1.3         | 1.0           | 1.5           | 1.7            | 1.0         | 0.4           | 1.9           |
| Autosampler               |            |             |               |               |                |             |               |               |
| Mean [pg/mL]              | 26.7       | 138.9       | 1,414.1       | 6,997         | 32.7           | 157.3       | 1,568.3       | 7,868         |
| Accuracy [%]              | 89.0       | 92.6        | 94.3          | 93.3          | 109.1          | 104.9       | 104.6         | 104.9         |
| Precision [%]             | 3.6        | 1.4         | 1.0           | 0.9           | 2.0            | 0.7         | 0.9           | 0.4           |
| Stability -20 °C          |            |             |               |               |                |             |               |               |
| Mean [pg/mL]              | 26.7       | 142.9       | 1,424.7       | 7,123         | 31.1           | 161.0       | 1,579.8       | 7,769         |
| Accuracy [%]              | 89.1       | 95.3        | 95.0          | 95.0          | 103.6          | 107.3       | 105.3         | 103.6         |
| Precision [%]             | 1.6        | 1.2         | 2.6           | 0.2           | 0.4            | 0.6         | 1.9           | 0.9           |
| Stability RT              |            |             |               |               |                |             |               |               |
| Mean [pg/mL]              | 27.1       | 142.3       | 1,431.5       | 7,088         | 30.8           | 157.1       | 1,565.9       | 7,736         |
| Accuracy [%]              | 90.3       | 94.8        | 95.4          | 94.5          | 102.7          | 104.7       | 104.4         | 103.2         |
| Precision [%]             | 3.0        | 1.8         | 1.0           | 0.5           | 1.3            | 0.5         | 1.2           | 0.8           |

Accuracy and precision values after three freeze-and-thaw cycles, after storing overnight in the autosampler at 15 °C, after 16 d in the freezer at -20 °C, or after 24 h at room temperature (RT). All measurements have been conducted in triplicates.

**Table S9.** Stability data for the assay validated for quantification of brain tissue.

| Brain Tissue     | Doxapram |      |       |       | 2-Ketodoxapram |       |       |       |
|------------------|----------|------|-------|-------|----------------|-------|-------|-------|
|                  | QC A     | QC B | QC C  | QC D  | QC A           | QC B  | QC C  | QC D  |
|                  | 1.5      | 15   | 150   | 1,500 | 1.5            | 15    | 150   | 1,500 |
| Freeze-and-thaw  |          |      |       |       |                |       |       |       |
| Mean [pg/sample] | 1.4      | 14.1 | 146.7 | 1,522 | 1.7            | 16.6  | 167.8 | 1,687 |
| Accuracy [%]     | 91.2     | 93.9 | 97.8  | 101.5 | 110.9          | 110.6 | 111.9 | 112.5 |
| Precision [%]    | 2.4      | 3.9  | 2.7   | 2.4   | 2.3            | 0.9   | 2.1   | 1.0   |
| Autosampler      |          |      |       |       |                |       |       |       |
| Mean [pg/sample] | 1.5      | 14.7 | 151.5 | 1,511 | 1.4            | 16.0  | 158.8 | 1,544 |
| Accuracy [%]     | 98.9     | 98.2 | 101.0 | 100.7 | 94.3           | 106.6 | 105.9 | 102.9 |
| Precision [%]    | 4.4      | 2.5  | 0.4   | 0.9   | 4.3            | 4.7   | 1.4   | 1.0   |

Accuracy and precision values after three freeze-and-thaw cycles or storing overnight in the autosampler at 15 °C. All measurements have been conducted in triplicates.

**Table S10.** Incurred sample reanalysis data for the assay validated for quantification of high plasma concentrations.

| High Plasma Sample | Doxapram           |                  |               | 2-Ketodoxapram     |                  |               |
|--------------------|--------------------|------------------|---------------|--------------------|------------------|---------------|
|                    | Reanalysis [ng/mL] | Original [ng/mL] | Deviation [%] | Reanalysis [ng/mL] | Original [ng/mL] | Deviation [%] |
| A250DP154A04P      | 2,032              | 2,149            | 5.6           | 18.7               | 20.9             | 11.1          |
| A250DP154A05P      | 1,426              | 1,423            | -0.2          | 25.8               | 25.9             | 0.4           |
| A250DP154A06P      | 1,095              | 1,088            | -0.6          | 30.1               | 30.7             | 2.2           |
| A250DP154A07P      | 858                | 893              | 4.0           | 30.1               | 31.2             | 3.4           |
| A250DP154A08P      | 610                | 619              | 1.5           | 30.5               | 30.9             | 1.4           |
| A250DP154A09P      | 408                | 413              | 1.4           | 29.2               | 31.2             | 6.8           |
| A250DP154A10P      | 310                | 321              | 3.3           | 30.1               | 30.5             | 1.6           |
| A250DP154A11P      | 130                | 129              | -1.1          | 27.6               | 27.5             | -0.2          |
| A250DP154A12P      | 59.8               | 61.8             | 3.3           | 21.9               | 21.9             | -0.2          |
| A250DP154A13P      | 33.8               | 34.9             | 3.2           | 17.3               | 17.4             | 0.8           |
| A250DP154A14P      | 19.1               | 19.0             | -0.7          | 13.1               | 13.1             | -0.1          |
| A250DP154A15P      | 10.5               | 11.0             | 4.1           | 9.39               | 9.42             | 0.3           |
| A250DP154A16P      | 6.94               | 7.04             | 1.4           | 7.22               | 7.29             | 0.9           |
| A250DP156A04P      | 1,648              | 1,702            | 3.2           | 29.2               | 30.0             | 2.6           |
| A250DP156A05P      | 1,013              | 1,343            | 28.0          | 26.0               | 33.3             | 24.8          |
| A250DP156A06P      | 1,026              | 1,052            | 2.5           | 33.9               | 34.3             | 1.2           |
| A250DP156A07P      | 935                | 1,003            | 7.0           | 33.7               | 36.3             | 7.5           |
| A250DP156A08P      | 684                | 784              | 13.6          | 32.8               | 38.7             | 16.6          |
| A250DP156A09P      | 508                | 578              | 12.9          | 35.1               | 39.5             | 11.8          |
| A250DP156A10P      | 363                | 402              | 10.2          | 34.0               | 38.5             | 12.3          |
| A250DP156A11P      | 164                | 172              | 4.7           | 29.0               | 29.9             | 3.0           |
| A250DP156A12P      | 84.8               | 89.9             | 5.8           | 23.2               | 25.7             | 10.2          |
| A250DP156A13P      | 46.2               | 50.3             | 8.4           | 19.1               | 20.6             | 7.8           |
| A250DP156A14P      | 29.3               | 30.9             | 5.1           | 14.7               | 15.3             | 4.0           |
| A250DP156A15P      | 17.8               | 19.1             | 7.1           | 10.6               | 11.4             | 7.0           |
| A250DP156A16P      | 12.2               | 13.7             | 11.6          | 8.17               | 8.73             | 6.6           |
| A250DP156A17P      | 11.6               | 12.7             | 9.7           | 5.89               | 6.50             | 9.9           |
| A250DP156A18P      | 9.00               | 10.1             | 11.2          | 4.29               | 4.73             | 9.7           |

Of the tested 28 samples, 96.4% (27 samples) were within the limit of  $\pm 20\%$  for doxapram as well as 2-ketodoxapram.

**Table S11.** Incurred sample reanalysis data for the assay validated for quantification of low plasma concentrations.

| Low Plasma Sample | Doxapram           |                  |               | 2-Ketodoxapram     |                  |               |
|-------------------|--------------------|------------------|---------------|--------------------|------------------|---------------|
|                   | Reanalysis [pg/mL] | Original [pg/mL] | Deviation [%] | Reanalysis [pg/mL] | Original [pg/mL] | Deviation [%] |
| A250DP154A19P     | 192                | 193              | 0.2           | 86.7               | 83.7             | -3.6          |
| A250DP154A41P     | 24,608             | 6,830            | -113.1        | 471                | 473              | 0.4           |
| A250DP154A58P     | 640                | 644              | 0.6           | 365                | 342              | -6.6          |
| A250DP155A19P     | 345                | 340              | -1.6          | 99.9               | 94.5             | -5.5          |
| A250DP155A20P     | 1,243              | 1,157            | -7.2          | 217                | 195              | -10.5         |
| A250DP155A38P     | 260                | 273              | 5.0           | 174                | 178              | 2.0           |
| A250DP155A39P     | 2,776              | 2,763            | -0.5          | 224                | 211              | -6.0          |
| A250DP155A40P     | 8,242              | 8,872            | 7.4           | 313                | 340              | 8.4           |
| A250DP155A57P     | 6,036              | 5,560            | -8.2          | 309                | 283              | -8.8          |
| A250DP155A75P     | 102                | 111              | 8.0           | 271                | 225              | -18.7         |
| A250DP156A23P     | 407                | 437              | 7.2           | 118                | 106              | -10.7         |
| A250DP156A24P     | 8,436              | 8,029            | -4.9          | 87.2               | 79.7             | -9.0          |
| A250DP156A42P     | 9,978              | 9,128            | -8.9          | 59.1               | 52.6             | -11.6         |
| A250DP156A60P     | 159                | 254              | 46.0          | 55.8               | 58.3             | 4.3           |

Of the tested 14 samples, 85.7% (12 samples) were within the limit of  $\pm 20\%$  for doxapram. After excluding one sample outside the calibration range for doxapram, 92.3% of the samples were within the limit. All 14 2-ketodoxapram samples were inside the limit.

**Table S12.** Incurred sample reanalysis data for the assay validated for quantification of brain tissue.

| Brain Tissue Sample | Doxapram               |                      |               | 2-Ketodoxapram         |                      |               |
|---------------------|------------------------|----------------------|---------------|------------------------|----------------------|---------------|
|                     | Reanalysis [pg/sample] | Original [pg/sample] | Deviation [%] | Reanalysis [pg/sample] | Original [pg/sample] | Deviation [%] |
| P154A1              | 41.7                   | 37.1                 | -11.7         | 2.56                   | 2.24                 | -13.6         |
| P154B1              | 75.2                   | 69.8                 | -7.5          | 3.03                   | 2.75                 | -9.5          |

Both analysed samples were within the limit of  $\pm 20\%$  for doxapram as well as 2-ketodoxapram.
